# Supplementary material for: Ginsenoside Rb1, salvianolic acid B and their combination modulate gut microbiota and improve glucolipid metabolism in high-fat diet induced obese mice
Source: PeerJ journal article supplement (doi:10.7717/peerj.10598), 2021-02-03

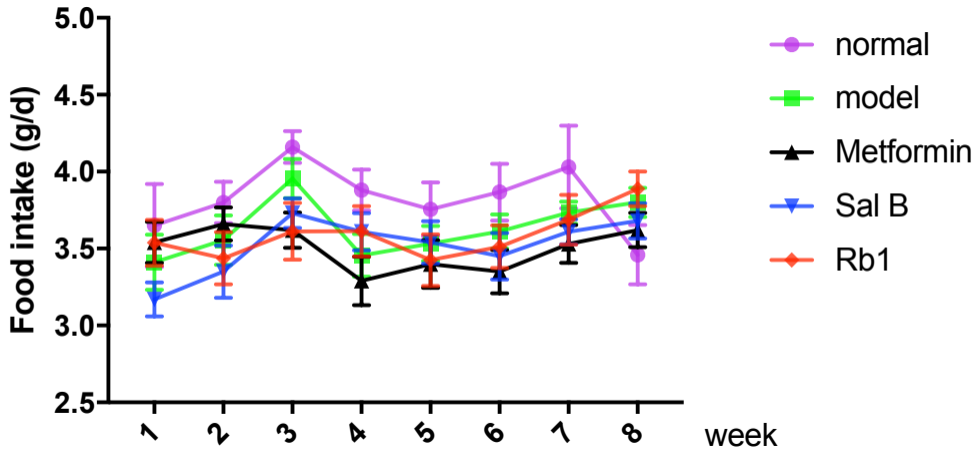

Supplement: Fig_S1_food_intake_0901.pdf [file Fig_S1_food_intake_0901.pdf]
