# Supplementary material for: Ginsenoside Rb1, salvianolic acid B and their combination modulate gut microbiota and improve glucolipid metabolism in high-fat diet induced obese mice
Source: PeerJ journal article supplement (doi:10.7717/peerj.10598), 2021-02-03

**A**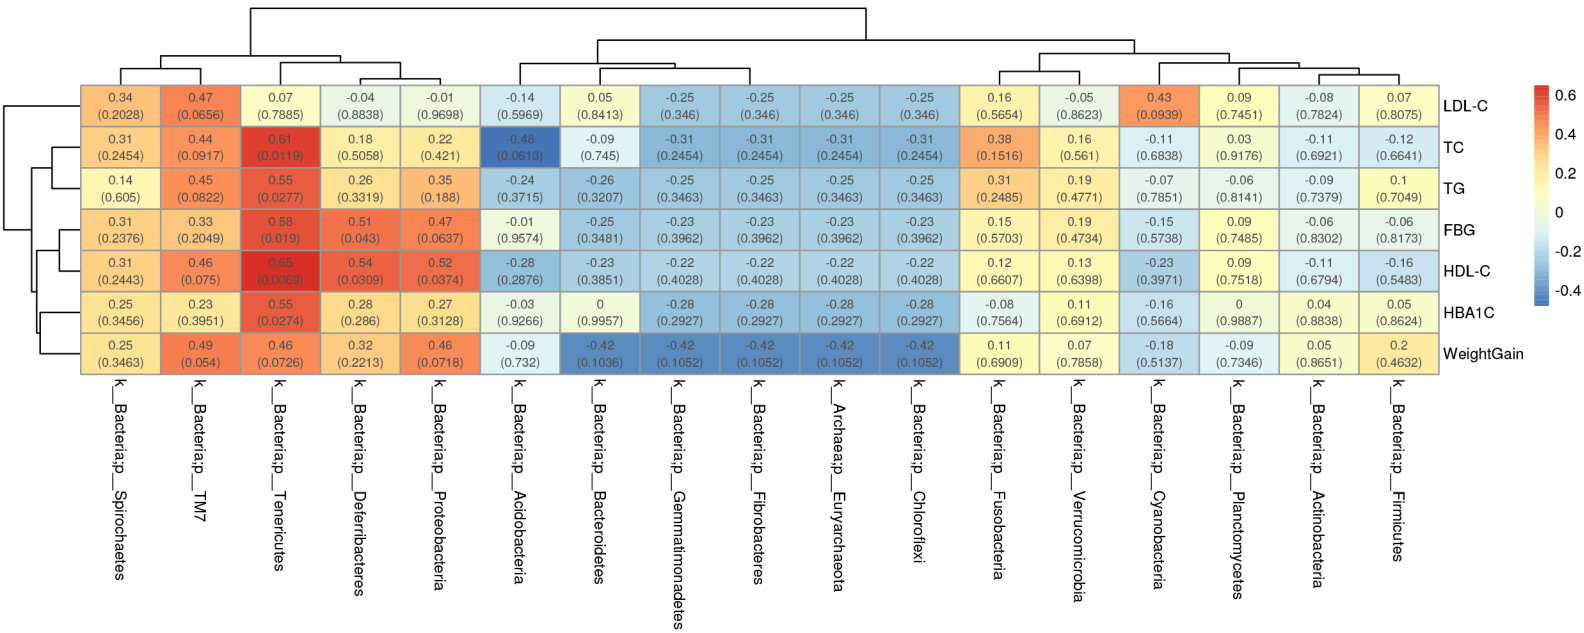**B**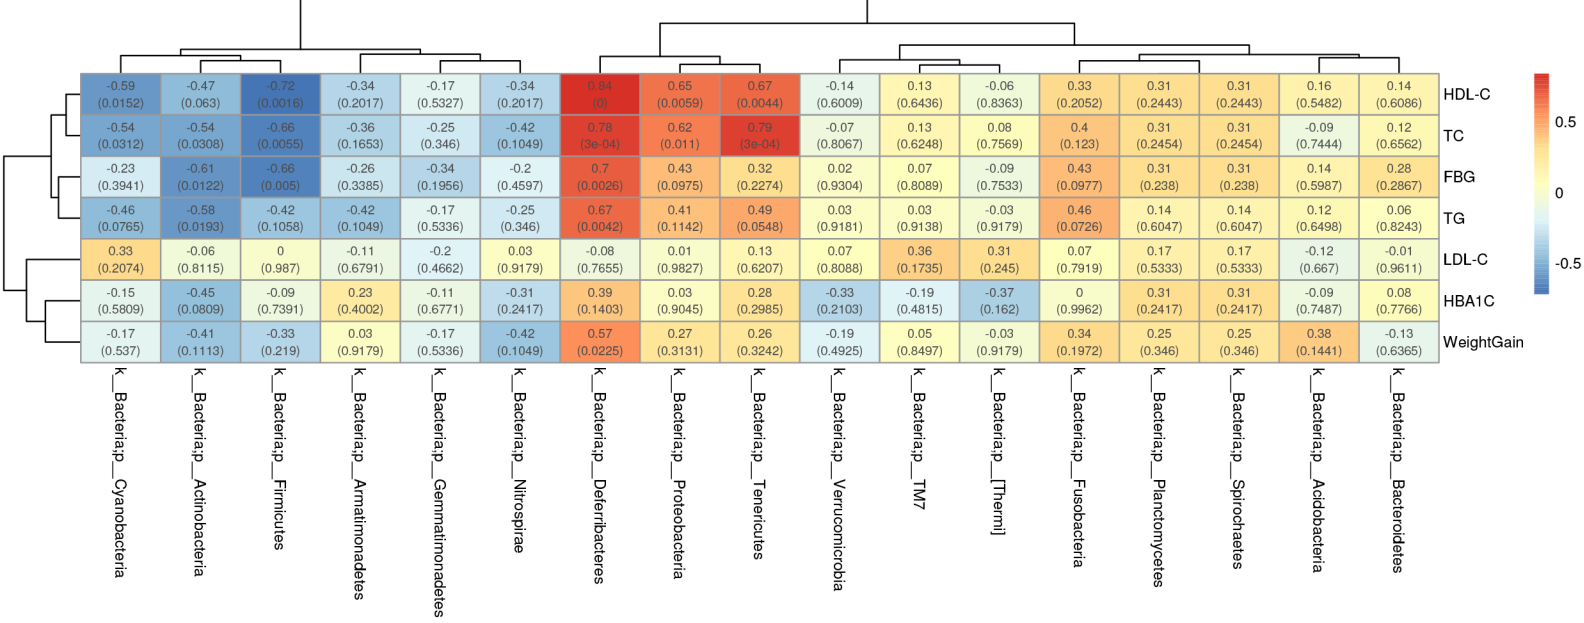**C**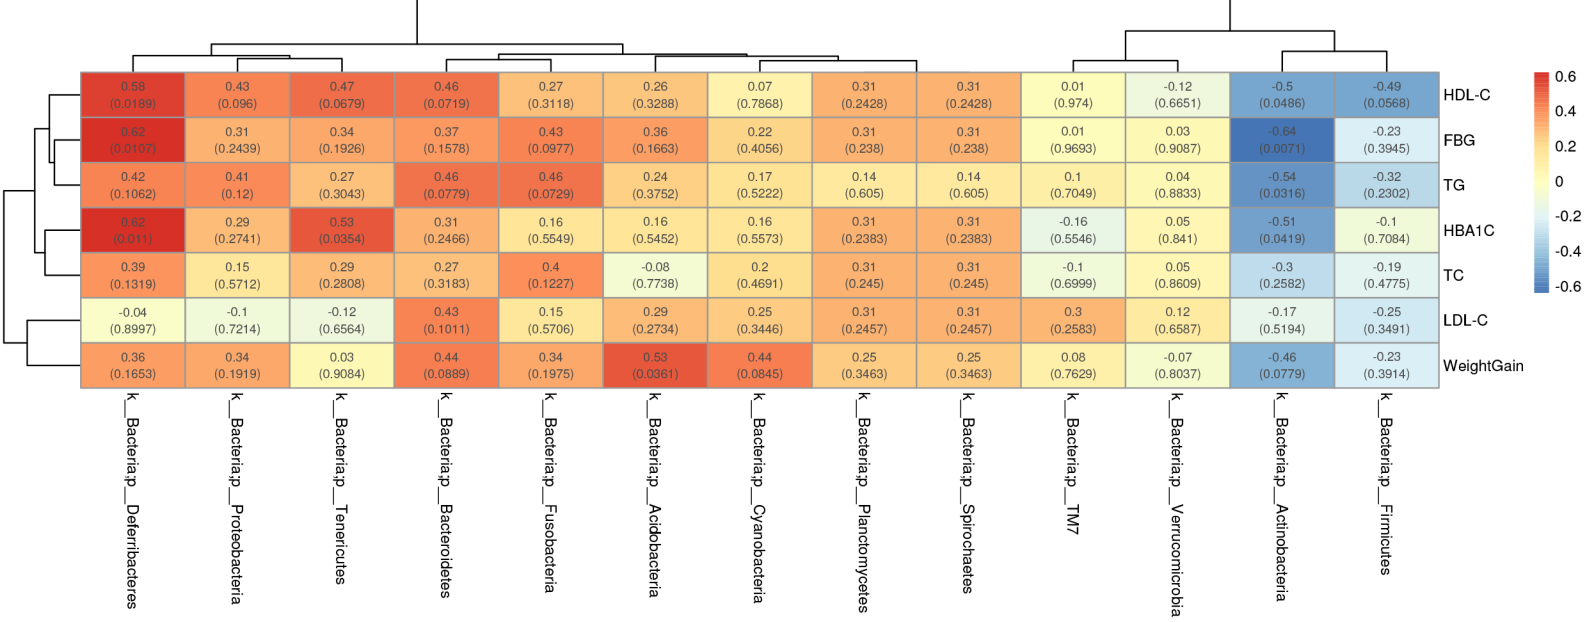

Supplement: Fig_S2-correlation_analysis.pdf [file Fig_S2-correlation_analysis.pdf]
