# Supplementary material for: Ginsenoside Rb1, salvianolic acid B and their combination modulate gut microbiota and improve glucolipid metabolism in high-fat diet induced obese mice
Source: PeerJ. 2021 Feb 3;9:e10598. doi: 10.7717/peerj.10598 (PMC7866888; doi:10.7717/peerj.10598)
Supplement: Supplemental Information 1 [file peerj-09-10598-s001.xlsx]

## Sheet: body weight
BW	Con							Rb1							SalB							Rb1SalB
0	58.6	68.2	59	62.2	58.7	72	63.5	67.7	53.8	56	66.8	57.7	58	62.7	53.9	56.2	67.6	68	57.7	69.8	64.6	61.6	71.3	62.2	59.6	72.2	60.2	53.7	65.5
2	51.4	67.1	63.7	60.6	58.1	75.1	68.9	57.8	46.7	50.5	65.4	56.8	56.7	61.2	52	50.3	72.1	66.1	54.5	67	63.9	59.9	69.8	58.8	58.2	50.8	57.3	48.9	63.7
4	51	66.1	66.2	63.5	61.7	75.9	70.7	60.9	50	52.2	68.6	58.6	60	63.2	51.5	48.8	74.3	68.8	56.2	67.1	64.2	56.4	69.8	57.7	58.2	52.6	58.7	52.6	67
6	57.5	69.4	66.1	63.5	56.5	76.3	72.3	59.1	48.1	53.3	68.1	57.4	56.7	60.9	50.6	46.6	70.5	70.2	57.8	66.9	66.9	55.7	67.7	59	59.2	53.6	63.8	54.6	71.9
8	57	69.1	70.2	63.8	60.5	74.9	68.4	62	48.6	53.5	66	53.2	54.3	60.7	44	47.5	66.6	68.5	56.1	65	64	52.4	64.6	54.3	56.1	53.2	59.4	53	65.4

## Sheet: bw%
bw(%)	Con							Rb1							SalB							Rb1SalB
0	100	100	100	100	100	100	100	100	100	100	100	100	100	100	100	100	100	100	100	100	100	100	100	100	100	100	100	100	100
2	87.71	98.39	107.97	97.43	98.98	104.31	108.5	85.38	86.8	90.18	97.9	98.44	97.76	97.61	96.47	89.5	106.66	97.21	94.45	95.99	98.92	97.24	97.9	94.53	97.65	70.36	95.18	91.06	97.25
4	87.03	96.92	112.2	102.09	105.11	105.42	111.34	89.96	92.94	93.21	102.69	101.56	103.45	100.8	95.55	86.83	109.91	101.18	97.4	96.13	99.38	91.56	97.9	92.77	97.65	72.85	97.51	97.95	102.29
6	98.12	101.76	112.03	102.09	96.25	105.97	113.86	87.3	89.41	95.18	101.95	99.48	97.76	97.13	93.88	82.92	104.29	103.24	100.17	95.85	103.56	90.42	94.95	94.86	99.33	74.24	105.98	101.68	109.77
8	97.27	101.32	118.98	102.57	103.07	104.03	107.72	91.58	90.33	95.54	98.8	92.2	93.62	96.81	81.63	84.52	98.52	100.74	97.23	93.12	99.07	85.06	90.6	87.3	94.13	73.68	98.67	98.7	99.85

## Sheet: FBG
FBG	Con								Rb1								SalB							Rb1SalB
0	8.4	9.9	9.9	7.9	7.3	9.2	8.1	7.7	7.6	8.4	8	7.8	8.3	6.8	7.3	6.3	8.3	8.7	7.1	7.4	7.63	7	8.9	7.3	6.9	6.9	7.2	9.8	6.9	8.3
2	7.9	7	7.2	7.3	7.7	9.2	7.8	13.3	5.7	7.2	5	7.2	7.3	8.2	6	7.9	8.3	6.1	7.7	7.4	10.9	6.7	9.8	7.1	6.2	7.9	7	7.3	7.3	7
4	7.1	6.8	10.3	8.8	7.5	9.8	8.8	14.1	5.6	6.4	7	7.8	7.1	6.7	5.9	6.9	7.3	6.9	5.6	7.2	8.4	8.4	8.1	8.5	6.4	6.8	6.8	6.8	6.8	10.8
6	7.4	8.3	10.3	8.9	8.3	7.9	8.8	10.6	7.3	6.3	5.1	6.9	7.1	5.9	6.4	6.3	6.7	7	7.6	7.6	6.7	7	5.3	7.2	7.4	7.1	7.7	7.4	7.3	8
8	8	8	9	8	8	8.8	9.1	8	6.2	6.7	6.2	6.3	5.3	6.1	6.7	5.7	6.2	6.4	5.9	5.3	7.3	6.5	4.1	6.5	6.6	7.3	7.2	5.9	6.4	7.3

## Sheet: HbA1c
Con	Rb1	SalB	Rb1SalB
10.2	6	6.4	6.6
6.6	8.7	6.8	6.6
7.2	6	6	6.4
7.6	6.2	7.8	6.4
9.4	5.8	6.8	6.4
8.6	6.6	6.8	6.2
7.8		6.2	6.6
6.8		7	6.4

## Sheet: OGTT 4th week
ogtt 4w	Con				Rb1				SalB				Rb1SalB
0	8.8	8.6	8.6	10.3	4.1	4.4	3.2	3.9	5.4	5.5	8.1	6.3	5.9	6.7	7.6	5.7
30 min	12.8	21.6	15	22.9	16.5	15.3	14.4	17.4	9.2	13.8	15.3	8.9	16.6	11.5	20.6	13
60 min	10.2	16.2	10.1	16.4	11.9	10.1	10.1	9.7	7.2	11.1	11.6	7.5	13.7	9.6	14.8	8.8
90 min	10.1	12.5	8.2	9.7	8.1	6.5	6.6	9.5	6.3	7.5	7.7	7.5	9.4	5.9	9.5	6.6
120 min	8.8	10.4	7.4	9.5	5.9	5.4	4.9	6.8	6.4	6	9.4	6	7.4	5.4	9.5	6.2
AUC	Con			Rb1			SalB			Rb1SalB
	mean	sd	n	mean	sd	n	mean	sd	n	mean	sd	n
	50.48	4.542	4	38.85	1.61	4	35.04	3.034	4	41.8	3.921	4

## Sheet: OGTT 8th week
	Con				Rb1				SalB				Rb1SalB
0	8	8	8.9	8.6	5.8	6.8	7.3	6.3	6.6	5.3	5.4	5.3	5.4	6.6	5.7	4.6
30 min	13.6	18.8	17.8	13.2	10.6	13.1	9.6	10.7	10.1	12.3	15.3	11.2	8.9	10.3	15.1	9.2
60 min	11.1	10.5	13.1	11.6	7.8	13.2	8.8	7.7	9.9	8.4	8.3	8.6	8.9	8.6	9.9	8.6
90 min	7.8	9.6	8.9	10.9	6.1	8.7	7.9	7.7	9.3	6.7	8.2	6.9	7.9	7.3	6.2	5.4
120 min	7.3	8.2	8.6	9.6	4.4	8.6	5.6	5.4	7.6	5.7	3.9	6.1	6.2	6.4	6.3	5.7
AUC	Con			Rb1			SalB			Rb1SalB
	mean	sd	n	mean	sd	n	mean	sd	n	mean	sd	n
	45.13	2.416	4	34.25	2.449	4	34.54	2.049	4	32.44	2.271	4

## Sheet: TC
TC
Con	Rb1	SalB	Rb1SalB
5.61	2.33	1.49	2.23
4.14	1.87	2.73	2.94
3.44	1.96	2.41	2.89
2.86	3.18	1.61	2.76
3.83	3.39	2.48	2.58
3.99	3.15	2.62	3.34
2.86	2.34	3.31	3.15
		3.22	3.12

## Sheet: TG
Con	Rb1	SalB	Rb1SalB
0.41	0.13	0.29	0.07
0.93	0.1	0.13	0.24
0.96	0.24	0.23	0.26
1.17	0.06	0.1	0.27
1.29	0.22	0.31	0.17
0.57	0.25	0.32	0.23
1.43	0.33	0.34	0.21
0.49	0.12	0.31	0.1

## Sheet: HDL-c
Con	Rb1	SalB	Rb1SalB
0.92	1.08	1.71	1.18
1.28	1.05	1.78	1.51
1.69	1.03	1.16	1.27
1.7	1.47	1.69	1.79
1.49	1.68	1.68	1.68
1.76	1.76	1.76	1.45
1.85	1.35	1.82	1.4
1.74		1.91	1.65

## Sheet: LDL-c
Con	Rb1	SalB	Rb1SalB
0.22	0.05	0.04	0.09
0.22	0.03	0.06	0.09
0.19	0.05	0.05	0.14
0.13	0.08	0.04	0.05
0.18	0.07	0.06	0.09
0.21		0.02	0.15
0.15		0.1	0.06
		0.1

[truncated: 1 more sheets: NEFA]
