# Supplementary material for: Ginsenoside Rb1, salvianolic acid B and their combination modulate gut microbiota and improve glucolipid metabolism in high-fat diet induced obese mice
Source: PeerJ journal article supplement (doi:10.7717/peerj.10598), 2021-02-03
Supplement: table_S1-AMOVA.pdf [file table_S1-AMOVA.pdf]

| <b>Vs_group</b> | <b>SS</b>         | <b>df</b>  | <b>Ms</b>         | <b>Fs</b> | <b>p-value</b> |
|-----------------|-------------------|------------|-------------------|-----------|----------------|
| SalB-Rb1SalB    | 0.117286(1.34384) | 1(1.34384) | 0.117286(1.34384) | 1.22188   | 0.141          |
| SalB-Rb1        | 0.156304(1.38737) | 1(1.38737) | 0.156304(1.38737) | 1.57727   | 0.015*         |
| SalB-Con        | 0.151978(1.35311) | 1(1.35311) | 0.151978(1.35311) | 1.57244   | 0.011*         |
| Rb1SalB-Rb1     | 0.16763(1.29933)  | 1(1.29933) | 0.16763(1.29933)  | 1.80617   | <0.001*        |
| Rb1SalB-Con     | 0.162372(1.26508) | 1(1.26508) | 0.162372(1.26508) | 1.79689   | 0.001*         |
| Rb1-Con         | 0.180782(1.30861) | 1(1.30861) | 0.180782(1.30861) | 1.93407   | 0.001*         |
